# Supplementary material for: Flexibility and mobility of SARS-CoV-2-related protein structures
Source: PubMed Central journal article supplement (PMC7896093; doi:10.1038/s41598-021-82849-2), 2021-02-19
Supplement: 41598_2021_82849_MOESM1_ESM.pdf [file 41598_2021_82849_MOESM1_ESM.pdf]

# ***Supplemental Material for*** **Flexibility and Mobility of SARS-CoV-2-related protein structures**

**Rudolf A. Römer<sup>1,2,3\*</sup>, Navodya S. Römer<sup>4</sup>, and A. Katrine Wallis<sup>5</sup>**

<sup>1</sup>CY Advanced Studies and LPTM (UMR8089 of CNRS), CY Cergy-Paris Université, F-95302 Cergy-Pontoise, France

<sup>2</sup>Department of Physics, University of Warwick, Coventry, CV4 7AL, United Kingdom

<sup>4</sup>School of Life Sciences, University of Lincoln, Brayford Pool Campus, Lincoln, LN6 7TS, United Kingdom

<sup>5</sup>School of Life Sciences, University of Warwick, Coventry, CV4 7AL, United Kingdom

\*r.roemer@warwick.ac.uk

## **ABSTRACT**

The supplemental material contains a list of all PDB structures used as well as links to some of the most important movie representations of the computed motions.

## **1 Sources and video links**

In Table [S1](#) we give the complete list of all PDB codes used in our study, link their supporting publications as well as the list of modes and  $E_{\text{cut}}$  values used in computing the full motion movies available from Ref.<sup>1</sup>. We also provide the full motion movies for the structures given in the main text in Fig. [3](#), namely the monomer of the SARS-Cov-2 spike ecto domain (6vxx)<sup>2</sup> and the dimer of the main protease<sup>3</sup>. Similarly, for main text Fig. [4](#) we include the movies of the closed SARS-Cov-2 spike ecto domain trimer in side<sup>4</sup> and top view<sup>5</sup>. Last, for the open SARS-Cov-2 spike ecto domain trimer in main text Fig. [5](#), we again give the side<sup>6</sup> and top views<sup>7</sup>. In addition, the rigidity dilution plots are given for the main protease (6lu7<sup>8</sup>), as well as the open and closed spike ecto domains, 6vxx<sup>9</sup> and 6vyb<sup>10</sup>, respectively.

| PDB code                                              | Ref.               | rigidity class. | $E_{\text{cut}}$ 's (kcal/mol) | protein type  | role                     | oligomeric state | error                                                          |
|-------------------------------------------------------|--------------------|-----------------|--------------------------------|---------------|--------------------------|------------------|----------------------------------------------------------------|
| The following PDB files were downloaded 18 April 2020 |                    |                 |                                |               |                          |                  |                                                                |
| 5r7y                                                  | <a href="#">II</a> | 1st             | 1, 2, 3, 0.2                   | Main protease | cleavage of poly protein | dimer            |                                                                |
| 5r7z                                                  | <a href="#">II</a> | 1st             | 1, 2, 3                        | Main protease | icw. Z1220452176         | dimer            |                                                                |
| 5r80                                                  | <a href="#">II</a> | 1st             | 1, 2, 3                        | Main protease | icw. Z18197050           | dimer            |                                                                |
| 5r81                                                  | <a href="#">II</a> | 2nd             | 1, 2, 3                        | Main protease | icw. Z1367324110         | dimer            |                                                                |
| 5r82                                                  | <a href="#">II</a> | 2nd             | 1, 2, 3                        | Main protease | icw. Z219104216          | dimer            |                                                                |
| 5r83                                                  | <a href="#">II</a> | 1st             | 1, 2, 3                        | Main protease | icw. Z44592329           | dimer            |                                                                |
| 5r84                                                  | <a href="#">II</a> | 1st             | 1, 2, 3, 2.5                   | Main protease | icw. Z31792168           | dimer            |                                                                |
| 5r8t                                                  | <a href="#">II</a> | 1st             | 1, 2, 3                        | Main protease |                          | dimer            |                                                                |
| 5re4                                                  | <a href="#">II</a> | 1st             | 1, 2, 3, 1.1                   | Main protease | icw. Z1129283193         | dimer            |                                                                |
| 5re5                                                  | <a href="#">II</a> | 1st             | 1, 2, 3                        | Main protease | icw. Z1129283193         | dimer            |                                                                |
| 5re6                                                  | <a href="#">II</a> | 1st             | 1, 2, 3                        | Main protease | icw. Z1129283193         | dimer            |                                                                |
| 5re7                                                  | <a href="#">II</a> |                 | 1, 2, 3                        | Main protease | icw. Z30932204           | dimer            | bond distance between intrasidue atoms 945 and 950 exceeds 6 Å |
| 5re8                                                  | <a href="#">II</a> | 1st             | 1, 2, 3                        | Main protease | icw. Z2737076969         | dimer            |                                                                |
| 5re9                                                  | <a href="#">II</a> |                 | 1, 2, 3                        | Main protease | icw. Z2856434836         | dimer            | bond distance between intrasidue atoms 945 and 950 exceeds 6 Å |
| 5rea                                                  | <a href="#">II</a> |                 | 1, 2, 3                        | Main protease | icw. Z31432226           | dimer            | bond distance between intrasidue atoms 954 and 979 exceeds 6 Å |
| 5reb                                                  | <a href="#">II</a> | 1st             | 1, 2, 3                        | Main protease | icw. Z2856434899         | dimer            |                                                                |
| 5rec                                                  | <a href="#">II</a> | 1st             | 1, 2, 3, 0.4                   | Main protease | icw. Z1587220559         | dimer            |                                                                |
| 5red                                                  | <a href="#">II</a> |                 | 1, 2, 3                        | Main protease | icw. Z2856434865         | dimer            | bond distance between intrasidue atoms 952 and 957 exceeds 6 Å |
| 5ree                                                  | <a href="#">II</a> | 1st             | 1, 2, 3                        | Main protease | icw. Z2217052426         | dimer            |                                                                |
| 5ref                                                  | <a href="#">II</a> | 1st             | 1, 2, 3                        | Main protease | icw. Z24758179           | dimer            |                                                                |
| 5reg                                                  | <a href="#">II</a> |                 | 1, 2, 3                        | Main protease | icw. Z1545313172         | dimer            | bond distance between intrasidue atoms 947 and 972 exceeds 6 Å |
| 5reh                                                  | <a href="#">II</a> | 1st             | 1, 2, 3, 1.8                   | Main protease | icw. Z111507846          | dimer            |                                                                |
| 5rei                                                  | <a href="#">II</a> | 1st             | 1, 2, 3                        | Main protease | icw. Z2856434856         | dimer            |                                                                |
| 5rej                                                  | <a href="#">II</a> | 1st             | 1, 2, 3                        | Main protease | icw. PCM-0102241         | dimer            |                                                                |

continued on next page

| PDB code | Ref. | rigidity class. | $E_{cut}$ 's (kcal/mol) | protein type  | role                  | oligomeric state | error |
|----------|------|-----------------|-------------------------|---------------|-----------------------|------------------|-------|
| 5rek     |      | 1st             | 1, 2, 3                 | Main protease | icw. PCM-0102327      | dimer            |       |
| 5rel     |      | 2nd             | 1, 2, 3, 1.5            | Main protease | icw. PCM-0102340      | dimer            |       |
| 5rem     |      | 1st             | 1, 2, 3                 | Main protease | icw. PCM-0103016      | dimer            |       |
| 5ren     |      | 1st             | 1, 2, 3                 | Main protease | icw. PCM-0102425      | dimer            |       |
| 5reo     |      | 1st             | 1, 2, 3, 1.7            | Main protease | icw. PCM-0102578      | dimer            |       |
| 5rep     |      | 1st             | 1, 2, 3                 | Main protease | icw. PCM-0102201      | dimer            |       |
| 5rer     |      | 1st             | 1, 2, 3                 | Main protease | icw. PCM-0102615      | dimer            |       |
| 5res     |      | 1st             | 1, 2, 3                 | Main protease | icw. PCM-0102281      | dimer            |       |
| 5ret     |      | 1st             | 1, 2, 3                 | Main protease | icw. PCM-0102269      | dimer            |       |
| 5reu     |      | 1st             | 1, 2, 3                 | Main protease | icw. PCM-0102395      | dimer            |       |
| 5rev     |      | 1st             | 1, 2, 3                 | Main protease | icw. PCM-0103072      | dimer            |       |
| 5rew     |      | 1st             | 1, 2, 3                 | Main protease | icw. PCM-0102275      | dimer            |       |
| 5rex     |      | 1st             | 1, 2, 3                 | Main protease | icw. PCM-0102287      | dimer            |       |
| 5rey     |      | 1st             | 1, 2, 3, 0.5            | Main protease | icw. PCM-0102911      | dimer            |       |
| 5rez     |      | 1st             | 1, 2, 3                 | Main protease | icw. POB0129          | dimer            |       |
| 5rf0     |      | 1st             | 1, 2, 3                 | Main protease | icw. POB0073          | dimer            |       |
| 5rf1     |      | 1st             | 1, 2, 3                 | Main protease | icw. NCL-00023830     | dimer            |       |
| 5rf2     |      | 1st             | 1, 2, 3                 | Main protease | icw. Z1741969146      | dimer            |       |
| 5rf3     |      | 1st             | 1, 2, 3                 | Main protease | icw. Z1741970824      | dimer            |       |
| 5rf4     |      | 1st             | 1, 2, 3                 | Main protease | icw. Z1741982125      | dimer            |       |
| 5rf5     |      | 1st             | 1, 2, 3, 1.5            | Main protease | icw. Z3241250482      | dimer            |       |
| 5rf6     |      | 2nd             | 1, 2, 3                 | Main protease | icw. Z1348371854      | dimer            |       |
| 5rf7     |      | 1st             | 1, 2, 3                 | Main protease | icw. Z316425948_minor | dimer            |       |
| 5rf8     |      | 1st             | 1, 2, 3                 | Main protease | icw. Z271004858       | dimer            |       |
| 5rf9     |      | 1st             | 1, 2, 3                 | Main protease | icw. Z217038356       | dimer            |       |
| 5rfa     |      | 1st             | 1, 2, 3                 | Main protease | icw. Z2643472210      | dimer            |       |
| 5rfb     |      | 1st             | 1, 2, 3                 | Main protease | icw. Z1271660837      | dimer            |       |
| 5rfc     |      | 1st             | 1, 2, 3                 | Main protease | icw. Z979145504       | dimer            |       |
| 5rfd     |      | 1st             | 1, 2, 3                 | Main protease | icw. Z126932614       | dimer            |       |
| 5rfe     |      | 1st             | 1, 2, 3                 | Main protease | icw. Z126932614       | dimer            |       |
| 5rff     |      | 1st             | 1, 2, 3                 | Main protease | icw. PCM-0102704      | dimer            |       |
| 5rfg     |      | 1st             | 1, 2, 3                 | Main protease | icw. PCM-0102372      | dimer            |       |
| 5rfh     |      | 1st             | 1, 2, 3                 | Main protease | icw. PCM-0102277      | dimer            |       |
| 5rfi     |      | 1st             | 1, 2, 3, 1.5            | Main protease | icw. PCM-0102353      | dimer            |       |
| 5rfj     |      | 1st             | 1, 2, 3, 1.7            | Main protease | icw. PCM-0103067      | dimer            |       |

continued on next page

| PDB code | Ref. | rigidity class. | $E_{cut}$ 's (kcal/mol) | protein type  | role                          | oligomeric state | error |
|----------|------|-----------------|-------------------------|---------------|-------------------------------|------------------|-------|
| 5rfk     | 11   | 1st             | 1, 2, 3                 | Main protease | icw. PCM-0102575              | dimer            |       |
| 5rfl     | 11   | 1st             | 1, 2, 3                 | Main protease | icw. PCM-0102389              | dimer            |       |
| 5rfm     | 11   | 1st             | 1, 2, 3, 0.5            | Main protease | icw. PCM-0102539              | dimer            |       |
| 5rfn     | 11   | 1st             | 1, 2, 3, 1.9            | Main protease | icw. PCM-0102868              | dimer            |       |
| 5rfo     | 11   | 1st             | 1, 2, 3                 | Main protease | n complex with PCM-0102972    | dimer            |       |
| 5rfp     | 11   | 2nd             | 1, 2, 3                 | Main protease | icw. PCM-0102190              | dimer            |       |
| 5rfq     | 11   | 1st             | 1, 2, 3, 1.8            | Main protease | icw. PCM-0102179              | dimer            |       |
| 5rfr     | 11   | 1st             | 1, 2, 3                 | Main protease | icw. PCM-0102169              | dimer            |       |
| 5rfs     | 11   | 1st             | 1, 2, 3                 | Main protease | icw. PCM-0102739              | dimer            |       |
| 5rft     | 11   | 1st             | 1, 2, 3                 | Main protease | icw. PCM-0102432              | dimer            |       |
| 5rfu     | 11   | 1st             | 1, 2, 3                 | Main protease | icw. PCM-0102121              | dimer            |       |
| 5rfv     | 11   | 1st             | 1, 2, 3                 | Main protease | icw. PCM-0102306              | dimer            |       |
| 5rfw     | 11   | 1st             | 1, 2, 3, 1.5            | Main protease | icw. PCM-0102243              | dimer            |       |
| 5rfx     | 11   | 1st             | 1, 2, 3                 | Main protease | icw. PCM-0102254              | dimer            |       |
| 5rfy     | 11   | 1st             | 1, 2, 3, 0.5<br>1.5     | Main protease | icw. PCM-0102974              | dimer            |       |
| 5rfz     | 11   | 1st             | 1, 2, 3                 | Main protease | icw. PCM-0102274              | dimer            |       |
| 5rg0     | 11   | 1st             | 1, 2, 3                 | Main protease | icw. PCM-0102535              | dimer            |       |
| 5rg1     | 11   | 1st             | 1, 2, 3, 1.5            | Main protease | icw. NCL-00024905             | dimer            |       |
| 5rg2     | 11   | 2nd             | 1, 2, 3, 2.5            | Main protease | icw. NCL-00025058             | dimer            |       |
| 5rg3     | 11   | 1st             | 1, 2, 3                 | Main protease | icw. NCL-00025412             | dimer            |       |
| 5rgg     | 11   | 1st             | 1, 2, 3, 1.5            | Main protease | icw. Z2856434890 (Mpro-x0165) | dimer            |       |
| 5rgh     | 11   | 1st             | 1, 2, 3                 | Main protease | icw. Z1619978933 (Mpro-x0395) | dimer            |       |
| 5rgi     | 11   | 1st             | 1, 2, 3                 | Main protease | icw. Z369936976 (Mpro-x0397)  | dimer            |       |
| 5rgj     | 11   | 2nd             | 1, 2, 3, 1.5            | Main protease | icw. Z1401276297 (Mpro-x0425) | dimer            |       |
| 5rgk     | 11   | 1st             | 1, 2, 3                 | Main protease | icw. Z1310876699 (Mpro-x0426) | dimer            |       |
| 5rgl     | 11   | 1st             | 1, 2, 3, 1.6            | Main protease | icw. PCM-0102962 (Mpro-x0705) | dimer            |       |
| 5rgm     | 11   | 1st             | 1, 2, 3                 | Main protease | icw. PCM-0102142 (Mpro-x0708) | dimer            |       |

continued on next page

| PDB code | Ref.               | rigidity class. | $E_{cut}$ 's (kcal/mol)          | protein type                                            | role                                                                       | oligomeric state | error                                                            |
|----------|--------------------|-----------------|----------------------------------|---------------------------------------------------------|----------------------------------------------------------------------------|------------------|------------------------------------------------------------------|
| 5rgn     | <a href="#">11</a> | 1st             | 1, 2, 3, 1.5                     | Main protease                                           | icw. PCM-0102759 (Mpro-x0731)                                              | dimer            |                                                                  |
| 5rgo     | <a href="#">11</a> | 1st             | 1, 2, 3                          | Main protease                                           | icw. PCM-0102248 (Mpro-x0736)                                              | dimer            |                                                                  |
| 5rgp     | <a href="#">11</a> | 1st             | 1, 2, 3                          | Main protease                                           | icw. PCM-0102628 (Mpro-x0771)                                              | dimer            |                                                                  |
| 5rgq     | <a href="#">11</a> | 1st             | 1, 2, 3, 1.75                    | Main protease                                           | icw. Z1849009686 (Mpro-x1086)                                              | dimer            |                                                                  |
| 5rgr     | <a href="#">11</a> | 1st             | 1, 2, 3                          | Main protease                                           | icw. Z328695024 (Mpro-x1101)                                               | dimer            |                                                                  |
| 5rgs     | <a href="#">11</a> | 1st             | 1, 2, 3                          | Main protease                                           | icw. Z1259086950 (Mpro-x1163)                                              | dimer            |                                                                  |
| 6lu7     | <a href="#">12</a> | 1st             | 1, 2, 3, 0.7, 1.5                | Main protease                                           | icw. an inhibitor N3                                                       | dimer            |                                                                  |
| 6lvn     | <a href="#">13</a> | brick           | 1, 2, 3                          | Spike protein HR2 domain                                | Spike protein does binding to receptor and involved in fusion of membranes | tetramer         |                                                                  |
| 6lxt     | <a href="#">14</a> | 1st             | 1, 2, 3, 3.3, 3.6, 4.6           | Spike protein post fusion core                          | S2 subunit                                                                 | trimer           |                                                                  |
| 6lzg     | <a href="#">15</a> | 1st             | 1, 2, 3                          | Spike protein domain icw. ace2                          |                                                                            | dimer            |                                                                  |
| 6m03     | <a href="#">16</a> | 1st             | 1, 2, 3                          | main protease                                           | apoform                                                                    | dimer            |                                                                  |
| 6m0j     | <a href="#">17</a> |                 | 1, 2, 3                          | Spike protein domain icw. ace2                          |                                                                            | hetero-dimer     | bond distance between intrasidue atoms 3327 and 3342 exceeds 6 Å |
| 6m17     | <a href="#">18</a> | domain          | 1, 2, 3, 0.1, 0.2, 0.4, 0.5, 0.7 | Ace2 icw. amino acid transport and spike protein domain |                                                                            | hetero-hexamer   |                                                                  |
| 6m18     | <a href="#">18</a> | domain          | 1, 2, 3, 0.03, 0.06, 0.2, 0.5    | ace2 icw. amino acid transporter                        | This structure contains no viral protein                                   | hetero-tetramer  |                                                                  |
| 6m1d     | <a href="#">18</a> | 2nd             | 1, 2, 3, 0.2, 0.4, 0.6           | ace2 icw. amino acid transporter                        | This structure contains no viral protein                                   | hetero-tetramer  |                                                                  |
| 6m2n     | <a href="#">19</a> | 2nd             | 1, 2, 3, 0.5                     | Protease                                                | structure with ligand                                                      | dimer            |                                                                  |
| 6m2q     | <a href="#">20</a> | 2nd             | 1, 2, 3                          | Protease                                                | apo protein                                                                | dimer            |                                                                  |

continued on next page

| PDB code | Ref.               | rigidity class. | $E_{cut}$ 's (kcal/mol)              | protein type                                          | role                                     | oligomeric state | error                                                            |
|----------|--------------------|-----------------|--------------------------------------|-------------------------------------------------------|------------------------------------------|------------------|------------------------------------------------------------------|
| 6m3m     | <a href="#">21</a> | 2nd             | 1, 2, 3, 0.15                        | Nucleocapsid protein RNA binding domain               |                                          | monomer          |                                                                  |
| 6m71     | <a href="#">22</a> | 2nd             | 1, 2, 3, 0.08 0.17 0.4 0.7           | RNA polymerase                                        | icw. cofactors                           | hetero-tetramer  |                                                                  |
| 6vsb     | <a href="#">23</a> | domain          | 1, 2, 3, 0.005 0.04 0.1 0.35 0.8 1.5 | Spike ecto domain                                     | EM structure 3.5 angstrom                | trimer           |                                                                  |
| 6vw1     | <a href="#">24</a> | 1st             | 1, 2, 3, 0.5 4.0 4.5                 | Spike receptor binding domain with Ace2               |                                          | hetero-dimer     |                                                                  |
| 6vww     | <a href="#">25</a> |                 | 1, 2, 3                              | NSP15 endoribonuclease                                |                                          | hexamer          | bond distance between intrasidue atoms 26 and 27 exceeds 6 Å     |
| 6vxs     | <a href="#">26</a> | domain          | 1, 2, 3, 1.3                         | ADP ribose phosphatase                                |                                          | monomer          |                                                                  |
| 6vxx     | <a href="#">27</a> | domain          | 1, 2, 3, 0.001 0.08 0.5 1.5          | Spike ecto domain                                     | EM structure 2.8 angstrom closed         | trimer           |                                                                  |
| 6vyb     | <a href="#">27</a> | domain          | 1, 2, 3, 0.001 0.5                   | Spike ecto domain                                     | Em structure open structure 3.2 angstrom | trimer           |                                                                  |
| 6vyo     | <a href="#">26</a> | brick           | 1, 2, 3, 0.1 0.7                     | nucleocapsid phosphoprotein                           |                                          | tetramer         |                                                                  |
| 6w01     | <a href="#">25</a> |                 | 1, 2, 3                              | NSP15 endoribonuclease                                | in the Complex with a Citrate            | hexamer          | bond distance between intrasidue atoms 9 and 24 exceeds 6 Å      |
| 6w02     | <a href="#">26</a> |                 | 1, 2, 3                              | ADP ribose phosphatase                                | complex with ADP ribose                  | monomer          | bond distance between intrasidue atoms 2095 and 2100 exceeds 6 Å |
| 6w41     | <a href="#">28</a> |                 | 1, 2, 3                              | Spike receptor binding domain complexed with antibody | icw. human antibody CR3022               | hetero-trimer    | steric clashes                                                   |
| 6w4b     | <a href="#">26</a> | 1st             | 1, 2, 3, 0.1 0.4                     | NSP9 RNA binding protein                              |                                          | dimer            |                                                                  |

continued on next page

| PDB code | Ref.          | rigidity class. | $E_{cut}$ 's (kcal/mol) | protein type                                                   | role                                                      | oligomeric state | error                                                            |
|----------|---------------|-----------------|-------------------------|----------------------------------------------------------------|-----------------------------------------------------------|------------------|------------------------------------------------------------------|
| 6w4h     | <sup>26</sup> |                 | 1, 2, 3                 | NSP16 - NSP10 Complex                                          |                                                           | hetero-dimer     | bond distance between intrasidue atoms 430 and 453 exceeds 6 Å   |
| 6w61     | <sup>26</sup> |                 | 1, 2, 3                 | NSP10 and NSP16 complex: methyltransferase stimulatory complex |                                                           | hetero-dimer     | bond distance between intrasidue atoms 320 and 345 exceeds 6 Å   |
| 6w63     | <sup>26</sup> | 2nd             | 1, 2, 3, 1.5            | Main protease                                                  | bound to potent broad-spectrum non-covalent inhibitor X77 | dimer            |                                                                  |
| 6w6y     | <sup>26</sup> | 2nd             | 1, 2, 3                 | ADP ribose phosphatase                                         | icw. AMP                                                  | monomer          |                                                                  |
| 6w75     | <sup>26</sup> |                 | 1, 2, 3                 | NSP10-NSP16 complex                                            |                                                           | hetero-dimer     | bond distance between intrasidue atoms 322 and 323 exceeds 6 Å   |
| 6w9c     | <sup>26</sup> | 1st             | 1, 2, 3, 0.5            | papain like protease                                           |                                                           | trimer           |                                                                  |
| 6w9q     | <sup>29</sup> | 1st             | 1, 2, 3                 | NSP9 RNA replicase                                             |                                                           | dimer            |                                                                  |
| 6wcf     | <sup>26</sup> |                 | 1, 2, 3                 | ADP ribose phosphatase                                         | icw. MES                                                  | monomer          | bond distance between intrasidue atoms 1189 and 1214 exceeds 6 Å |
| 6wen     | <sup>26</sup> |                 | 1, 2, 3                 | ADP ribose phosphatase                                         | apo form                                                  | monomer          | bond distance between intrasidue atoms 1141 and 1147 exceeds 6 Å |
| 6y2e     | <sup>16</sup> | 2nd             | 1, 2, 3                 | Main protease                                                  |                                                           | dimer            |                                                                  |
| 6y2f     | <sup>16</sup> | 1st             | 1, 2, 3                 | Main protease                                                  | monoclinic form                                           | dimer            |                                                                  |
| 6y2g     | <sup>16</sup> | 2nd             | 1, 2, 3, 0.5, 1.5       | Main protease                                                  | orthorhombic form                                         | dimer            |                                                                  |
| 6y84     | <sup>30</sup> |                 | 1, 2, 3                 | Main protease                                                  | unliganded active site                                    | dimer            | bond distance between intrasidue atoms 4600 and 4603 exceeds 6 Å |
| 6yb7     | <sup>30</sup> | 2nd             | 1, 2, 3, 2.5, 4.0       | Main protease                                                  | supercedes 6y84                                           | dimer            |                                                                  |

continued on next page

| PDB code | Ref.               | rigidity class. | $E_{cut}$ 's (kcal/mol)     | protein type                                    | role                                | oligomeric state | error                                                            |
|----------|--------------------|-----------------|-----------------------------|-------------------------------------------------|-------------------------------------|------------------|------------------------------------------------------------------|
| 6yi3     | <a href="#">31</a> |                 | 1, 2, 3                     | nucleocapsid phosphoprotein                     | NMR structure                       |                  | bond distance between intrasidue atoms 4600 and 4603 exceeds 6 Å |
| 6yla     | <a href="#">32</a> | 2nd             | 1, 2, 3, 0.7<br>1.5         | spike receptor binding domain with Fab fragment |                                     | heterotrimer     |                                                                  |
| 7btf     | <a href="#">22</a> | 2nd             | 1, 2, 3, 0.1<br>0.3 0.4 0.8 | RNA polymerase                                  | icw. cofactors in reduced condition | heterotetramer   |                                                                  |

The following PDB files were downloaded 19 May 2020

|      |                    |                         |                                   |               |                                                                                                    |                |                                                                    |
|------|--------------------|-------------------------|-----------------------------------|---------------|----------------------------------------------------------------------------------------------------|----------------|--------------------------------------------------------------------|
| 3r24 | <a href="#">21</a> | 1st                     | 1, 2, 3                           | transferase   | RNA maturation                                                                                     | heterodimer    |                                                                    |
| 6lze | <a href="#">16</a> | 2nd                     | 1, 2, 3, 1.7                      |               | icw. an inhibitor 11a                                                                              | dimer          |                                                                    |
| 6m0k | <a href="#">16</a> | 2nd                     | 1, 2, 3                           | main protease | icw. an inhibitor 11b                                                                              | dimer          |                                                                    |
| 6w37 | <a href="#">26</a> | brick                   | 1, 2, 3                           |               |                                                                                                    | monomer        |                                                                    |
| 6w7y | <a href="#">21</a> | domain                  | 1, 2, 3,<br>0.015 0.15<br>0.4 0.6 |               | SARS-CoV-2 reactive human antibody CR3022                                                          | dimer          |                                                                    |
| 6wey | <a href="#">33</a> | 1, 2, 3, 2.5<br>4.0 5.0 |                                   |               |                                                                                                    | monomer        |                                                                    |
| 6wiq | <a href="#">26</a> | "3,2"                   | 1, 2, 3,<br>0.001 0.03<br>0.5 1.5 |               |                                                                                                    | heterotetramer |                                                                    |
| 6wji | <a href="#">26</a> | domain                  | 1, 2, 3,<br>0.001 0.13<br>0.6 1.7 |               | Crystal Structure of C-terminal Dimerization Domain of Nucleocapsid Phosphoprotein from SARS-CoV-2 | dimer          |                                                                    |
| 6wjt | <a href="#">26</a> |                         | 1, 2, 3                           |               |                                                                                                    | heterodimer    | bond distance between intrasidue atoms 01952 and 01967 exceeds 6 Å |
| 6wkp | <a href="#">26</a> | brick                   | 1, 2, 3,<br>0.08 0.5              |               | monoclinic crystal form                                                                            | tetramer       |                                                                    |
| 6wkq | <a href="#">26</a> | 2nd                     | 1, 2, 3                           |               | icw. Sinefungin                                                                                    | heterodimer    |                                                                    |

continued on next page



| PDB code     | Ref.          | rigidity class. | $E_{cut}$ 's (kcal/mol)      | protein type | role                                                                                           | oligomeric state | error                                                              |
|--------------|---------------|-----------------|------------------------------|--------------|------------------------------------------------------------------------------------------------|------------------|--------------------------------------------------------------------|
| 6wks-bundle1 | <sup>34</sup> | 2nd             | 1, 2, 3, 0.01<br>0.2 0.5 1.5 |              |                                                                                                | hetero-tetramer  |                                                                    |
| 6wlc         | <sup>26</sup> |                 | 1, 2, 3                      |              | in the Complex with Uridine-5'-Monophosphate                                                   | hexamer          | bond distance between intrasidue atoms 1 and 4 exceeds 6 Å         |
| 6wnp         | <sup>26</sup> |                 | 1, 2, 3                      |              | bound to Boceprevir at 1.45 Å                                                                  | dimer            | bond distance between intrasidue atoms 04378 and 04381 exceeds 6 Å |
| 6woj         | <sup>26</sup> | 2nd             | 1, 2, 3, 4                   |              | icw. ADP-ribose                                                                                | monomer          |                                                                    |
| 6wq3         | <sup>26</sup> |                 | 1, 2, 3                      |              | icw. 7-methyl-GpppA and S-adenosyl-L-homocysteine.                                             | hetero-dimer     | bond distance between intrasidue atoms 03495 and 03516 exceeds 6 Å |
| 6wqd         | <sup>26</sup> |                 | 1, 2, 3                      |              | Complex of NSP7 and the C-terminal Domain of NSP8 from SARS-CoV-2                              | hetero-tetramer  | bond distance between intrasidue atoms 359 and 376 exceeds 6 Å     |
| 6wqf         | <sup>35</sup> |                 | 1, 2, 3                      |              | Revealed by Room Temperature X-ray Crystallography                                             | dimer            | bond distance between intrasidue atoms 03306 and 03331 exceeds 6 Å |
| 6wrh         | <sup>26</sup> |                 | 1, 2, 3                      |              |                                                                                                | monomer          | bond distance between intrasidue atoms 02089 and 02110 exceeds 6 Å |
| 6wrz         | <sup>26</sup> |                 | 1, 2, 3                      |              |                                                                                                | hetero-dimer     | bond distance between intrasidue atoms 03491 and 03510 exceeds 6 Å |
| 6wtc         | <sup>26</sup> | domain          | 1, 2, 3, 4                   |              | Second Form of the Co-factor Complex of NSP7 and the C-terminal Domain of NSP8 from SARS CoV-2 | hetero-tetramer  |                                                                    |

continued on next page

| PDB code     | Ref.               | rigidity class. | $E_{cut}$ 's (kcal/mol)              | protein type                           | role                                          | oligomeric state | error                                                              |
|--------------|--------------------|-----------------|--------------------------------------|----------------------------------------|-----------------------------------------------|------------------|--------------------------------------------------------------------|
| 6wvn         | <a href="#">26</a> | 2nd             | 1, 2, 3                              |                                        | icw. 7-methyl-GpppA and S-Adenosylmethionine. | hetero-dimer     |                                                                    |
| 6y7m-bundle1 | <a href="#">16</a> | 2nd             | 1, 2, 3, 0.3<br>0.4                  |                                        |                                               | dimer            |                                                                    |
| 6yhu         | <a href="#">36</a> | domain          | 1, 2, 3                              | nsp7-nsp8 complex of SARS-CoV-2        |                                               | hetero-dimer     |                                                                    |
| 6ym0         | <a href="#">32</a> |                 | 1, 2, 3                              |                                        | icw. CR3022 Fab                               | hetero-trimer    | steric clashes                                                     |
| 6ynq         | <a href="#">37</a> |                 | 1, 2, 3                              | main protease                          | bound to 2-Methyl-1-tetralone                 | dimer            | bond distance between intrasidue atoms 062 and 085 exceeds 6 Å     |
| 6yor         | <a href="#">38</a> | 2nd             | 1, 2, 3, 0.26                        | SARS-CoV-2 spike S1 protein            | icw. CR3022 Fab                               | hetero-trimer    |                                                                    |
| 6yt8         | <a href="#">39</a> |                 | 1, 2, 3                              | main protease                          | bound to pyrithione zinc                      | dimer            | bond distance between intrasidue atoms 079 and 082 exceeds 6 Å     |
| 6yva         | <a href="#">40</a> | 1st             | 1, 2, 3, 0.15<br>0.3<br>1.5          |                                        |                                               | hetero-dimer     |                                                                    |
| 6ywk         | <a href="#">41</a> | domain          | 1, 2, 3, 1.5                         | SARS-CoV-2 (Covid-19) NSP3 macrodomain | icw. HEPES                                    | monomer          |                                                                    |
| 6ywl         | <a href="#">41</a> | domain          | 1, 2, 3, 1.5                         | SARS-CoV-2 (Covid-19) NSP3 macrodomain | icw. ADP-ribose                               | monomer          |                                                                    |
| 6ywm         | <a href="#">41</a> | domain          | 1, 2, 3, 2.5<br>4.0                  | SARS-CoV-2 (Covid-19) NSP3 macrodomain | icw. MES                                      | monomer          |                                                                    |
| 6yyt         | <a href="#">42</a> | 2nd             | 1, 2, 3, 0.004<br>0.15<br>0.3<br>0.4 | replicating SARS-CoV-2 polymerase      |                                               | hetero-tetramer  |                                                                    |
| 6yz1         | <a href="#">43</a> |                 | 1, 2, 3                              |                                        | complex with Sinefungin                       | hetero-dimer     | bond distance between intrasidue atoms 03770 and 03773 exceeds 6 Å |

continued on next page

| PDB code                                            | Ref.               | rigidity class. | $E_{cut}$ 's (kcal/mol)                  | protein type                                       | role                                                                                | oligomeric state    | error                                                                         |
|-----------------------------------------------------|--------------------|-----------------|------------------------------------------|----------------------------------------------------|-------------------------------------------------------------------------------------|---------------------|-------------------------------------------------------------------------------|
| 7bqy                                                | <a href="#">12</a> | 2nd             | 1, 2, 3, 0.5<br>1.2                      | main protease                                      | icw. AN INHIBITOR N3 at 1.7 angstrom                                                | dimer               |                                                                               |
| 7bro                                                | <a href="#">44</a> | 2nd             | 1, 2, 3, 1.3<br>1.5                      | main protease                                      |                                                                                     | dimer               |                                                                               |
| 7brp                                                | <a href="#">44</a> | 2nd             | 1, 2, 3, 0.5<br>0.75 1.3                 | main protease                                      | complexed with Bo-<br>ceprevir                                                      | dimer               |                                                                               |
| 7brr                                                | <a href="#">44</a> | 1st             | 1, 2, 3, 1.5                             | main protease                                      | complexed with<br>GC376                                                             | dimer               |                                                                               |
| 7buy                                                | <a href="#">12</a> | 2nd             | 1, 2, 3, 0.5                             | main protease                                      | icw. carmofur                                                                       | dimer               |                                                                               |
| 7bv1                                                | <a href="#">45</a> | 2nd             | 1, 2, 3,<br>0.05 0.15<br>0.25 0.5<br>1.5 | nsp12-nsp7-nsp8 com-<br>plex                       | apo?                                                                                | hetero-<br>tetramer |                                                                               |
| 7bv2                                                | <a href="#">45</a> | 2nd             | 1, 2, 3,<br>0.04 0.15<br>0.4             | nsp12-nsp7-nsp8 com-<br>plex                       | bound to the template-<br>primer RNA and<br>triphosphate form of<br>Remdesivir(RTP) | hetero-<br>trimer   |                                                                               |
| 7bz5                                                | <a href="#">46</a> | brick           | 1, 2, 3                                  | COVID-19 virus<br>spike receptor-binding<br>domain | complexed with a neu-<br>tralizing antibody                                         | hetero-<br>trimer   |                                                                               |
| The following PDB files were downloaded 29 May 2020 |                    |                 |                                          |                                                    |                                                                                     |                     |                                                                               |
| 5rgt                                                | <a href="#">11</a> |                 | 1, 2, 3                                  | main protease                                      | icw. Z4439011607                                                                    | dimer               | bond distance between<br>intraresidue atoms<br>03302 and 03325<br>exceeds 6 Å |
| 5rgu                                                | <a href="#">11</a> | 1st             | 1, 2, 3, 2.5                             | main protease                                      | icw. Z4444622180                                                                    | dimer               |                                                                               |
| 5rgv                                                | <a href="#">11</a> | 1st             | 1, 2, 3                                  | main protease                                      | icw. Z4444622066                                                                    | dimer               |                                                                               |
| 5rgw                                                | <a href="#">11</a> | 1st             | 1, 2, 3                                  | main protease                                      | icw. Z4444621910                                                                    | dimer               |                                                                               |
| 5rgx                                                | <a href="#">11</a> | 1st             | 1, 2, 3                                  | main protease                                      | icw. Z1344037997                                                                    | dimer               |                                                                               |
| 5rgy                                                | <a href="#">11</a> | brick           | 1, 2, 3, 1.7<br>1.9                      | main protease                                      | icw. Z1535580916                                                                    | dimer               |                                                                               |
| 5rgz                                                | <a href="#">11</a> | 1st             | 1, 2, 3                                  | main protease                                      | icw. Z1343543528                                                                    | dimer               |                                                                               |
| 5rh0                                                | <a href="#">11</a> | 1st             | 1, 2, 3                                  | main protease                                      | icw. Z1286870272                                                                    | dimer               |                                                                               |
| 5rh1                                                | <a href="#">11</a> | 1st             | 1, 2, 3, 1.7                             | main protease                                      | icw. Z2010253653                                                                    | dimer               |                                                                               |
| 5rh2                                                | <a href="#">11</a> | 2nd             | 1, 2, 3                                  | main protease                                      | icw. Z1129289650                                                                    | dimer               |                                                                               |

continued on next page

| PDB code | Ref.               | rigidity class. | $E_{cut}$ 's (kcal/mol) | protein type                  | role                                                          | oligomeric state | error                                                              |
|----------|--------------------|-----------------|-------------------------|-------------------------------|---------------------------------------------------------------|------------------|--------------------------------------------------------------------|
| 5rh3     | <a href="#">11</a> |                 | 1, 2, 3                 | main protease                 | icw. Z1264525706                                              | dimer            | bond distance between intrasidue atoms 03302 and 03325 exceeds 6 Å |
| 5rh4     | <a href="#">11</a> |                 | 1, 2, 3                 | main protease                 | icw. Z1530425063                                              | dimer            | bond distance between intrasidue atoms 02536 and 02551 exceeds 6 Å |
| 5rh5     | <a href="#">11</a> | 1st             | 1, 2, 3, 2.1<br>2.4     | main protease                 | icw. Z4439011520                                              | dimer            |                                                                    |
| 5rh6     | <a href="#">11</a> | 2nd             | 1, 2, 3                 | main protease                 | icw. Z4439011588                                              | dimer            |                                                                    |
| 5rh7     | <a href="#">11</a> |                 | 1, 2, 3                 | main protease                 | icw. Z4439011584                                              | dimer            | bond distance between intrasidue atoms 03310 and 03333 exceeds 6 Å |
| 5rh8     | <a href="#">11</a> | 1st             | 1, 2, 3, 1.5            | main protease                 | icw. Z4444621965                                              | dimer            |                                                                    |
| 5rh9     | <a href="#">11</a> |                 | 1, 2, 3                 | main protease                 | icw. Z4438424255                                              | dimer            | bond distance between intrasidue atoms 03302 and 03325 exceeds 6 Å |
| 5rha     | <a href="#">11</a> |                 | 1, 2, 3                 | main protease                 | icw. Z147647874                                               | dimer            | bond distance between intrasidue atoms 03302 and 03327 exceeds 6 Å |
| 6wps     | <a href="#">47</a> | domain          | 1, 2, 3                 | SARS-CoV-2 spike glycoprotein | icw. the S309 neutralizing antibody Fab fragment              | Hetero-9-mer     |                                                                    |
| 6wpt     | <a href="#">47</a> | domain          | 1, 2, 3                 | SARS-CoV-2 spike glycoprotein | icw. the S309 neutralizing antibody Fab fragment (open state) | Hetero-7-mer     |                                                                    |
| 6wtj     | <a href="#">48</a> | 2nd             | 1, 2, 3                 | main protease                 | Feline coronavirus drug inhibits                              | dimer            |                                                                    |
| 6wtk     | <a href="#">48</a> | 1st             | 1, 2, 3                 | main protease                 | Feline coronavirus drug inhibits                              | dimer            |                                                                    |
| 6wtm     | <a href="#">48</a> | 2nd             | 1, 2, 3                 | main protease                 | Feline coronavirus drug inhibits                              | dimer            |                                                                    |
| 6wtt     | <a href="#">49</a> | 2nd             | 1, 2, 3                 | main protease                 | with inhibitor GC-376                                         | dimer            |                                                                    |

continued on next page

| PDB code | Ref.               | rigidity class. | $E_{cut}$ 's (kcal/mol)      | protein type                                                  | role                                                    | oligomeric state | error                                                              |
|----------|--------------------|-----------------|------------------------------|---------------------------------------------------------------|---------------------------------------------------------|------------------|--------------------------------------------------------------------|
| 6wuu     | <a href="#">50</a> | 1st             | 1, 2, 3, 0.5                 | Papain-like protease                                          | icw. peptide inhibitor VIR250                           | hetero-dimer     |                                                                    |
| 6wx4     | <a href="#">50</a> |                 | 1, 2, 3                      | Papain-like protease                                          | icw. peptide inhibitor VIR251                           | monomer          | steric clashes                                                     |
| 6wxc     | <a href="#">26</a> |                 | 1, 2, 3                      | NSP15 Endoribonuclease                                        | n the Complex with potential repurposing drug Tipiracil | hexamer          | bond distance between intrasidue atoms 1 and 4 exceeds 6 Å         |
| 6wxd     | <a href="#">51</a> | brick           | 1, 2, 3                      | Nsp9 RNA-replicase                                            |                                                         | dimer            |                                                                    |
| 6wzo     | <a href="#">52</a> | domain          | 1, 2, 3, 0.5                 | "Nucleocapsid dimerization domain, P1 form"                   |                                                         | dimer            |                                                                    |
| 6wzq     | <a href="#">52</a> | domain          | 1, 2, 3                      | "Nucleocapsid dimerization domain, P21 form"                  |                                                         | dimer            |                                                                    |
| 6wzu     | <a href="#">26</a> |                 | 1, 2, 3                      | Papain-Like Protease                                          | P3221 space group                                       | monomer          | bond distance between intrasidue atoms 02023 and 02026 exceeds 6 Å |
| 6x1b     | <a href="#">26</a> |                 | 1, 2, 3                      | NSP15 Endoribonuclease                                        | in the Complex with the Product Nucleotide GpU.         | hexamer          | bond distance between intrasidue atoms 05377 and 05380 exceeds 6 Å |
| 6x29     | <a href="#">53</a> | domain          | 1, 2, 3, 0.002 0.05 0.3      |                                                               |                                                         | trimer           |                                                                    |
| 6x2a     | <a href="#">53</a> | domain          | 1, 2, 3, 0.005 0.1           |                                                               |                                                         | trimer           |                                                                    |
| 6x2b     | <a href="#">53</a> | domain          | 1, 2, 3, 0.005 0.14 0.5      |                                                               |                                                         | trimer           |                                                                    |
| 6x2c     | <a href="#">53</a> | domain          | 1, 2, 3, 0.001 0.05 0.25 0.7 |                                                               |                                                         | trimer           |                                                                    |
| 6yun     | <a href="#">54</a> | domain          | 1, 2, 3                      | C-terminal Dimerization Domain of Nucleocapsid Phosphoprotein |                                                         | dimer            | bond distance between intrasidue atoms 03404 and 03429 exceeds 6 Å |

continued on next page

| PDB code | Ref.               | rigidity class. | $E_{cut}$ 's (kcal/mol) | protein type                                         | role                                                        | oligomeric state | error          |
|----------|--------------------|-----------------|-------------------------|------------------------------------------------------|-------------------------------------------------------------|------------------|----------------|
| 6yvf     | <a href="#">37</a> |                 | 1, 2, 3                 | Main Protease                                        | bound to AZD6482                                            | dimer            | steric clashes |
| 6yz6     | <a href="#">37</a> | 1st             | 1, 2, 3                 |                                                      | hemiacetal complex of Main Protease and Leupeptin           | dimer            |                |
| 7bw4     | <a href="#">35</a> | 2nd             | 1, 2, 3, 0.015          | RNA-dependent RNA polymerase                         |                                                             | hetero-tetramer  |                |
| 7c01     | <a href="#">36</a> | 2nd             | 1, 2, 3                 |                                                      | potent human neutralizing antibody targeting SARS-CoV-2 RBD | hetero-trimer    |                |
| 7c22     | <a href="#">37</a> | domain          | 1, 2, 3, 0.5            | C-terminal domain of SARS-CoV-2 nucleocapsid protein |                                                             | dimer            |                |
| 7c2i     | <a href="#">38</a> | 2nd             | 1, 2, 3                 | nsp16-nsp10 heterodimer                              | icw. SAM (with additional SAM during crystallization)       | hetero-dimer     |                |
| 7c2j     | <a href="#">38</a> | 2nd             | 1, 2, 3, 1.3            | nsp16-nsp10 heterodimer                              | icw. SAM (with additional SAM during crystallization)       | hetero-dimer     |                |

The following PDB files were downloaded 27 July 2020

|      |                    |               |                                |                                         |                                                                |        |                                                                    |
|------|--------------------|---------------|--------------------------------|-----------------------------------------|----------------------------------------------------------------|--------|--------------------------------------------------------------------|
| 5rhb | <a href="#">11</a> | 1st           | 1, 2, 3                        | main protease                           |                                                                | dimer  |                                                                    |
| 5rhc | <a href="#">11</a> | 1st           | 1, 2, 3                        | main protease                           |                                                                | dimer  |                                                                    |
| 5rhd | <a href="#">11</a> | 1st           | 1, 2, 3, 3.2                   | main protease                           |                                                                | dimer  |                                                                    |
| 5rhe | <a href="#">11</a> | 1st           | 1, 2, 3                        | main protease                           |                                                                | dimer  |                                                                    |
| 5rhf | <a href="#">11</a> | 1st           | 1, 2, 3                        | main protease                           |                                                                | dimer  |                                                                    |
| 6m1v | <a href="#">59</a> | domain, brick | 1, 2, 3, 4.6, 5.05             | post fusion core of S2 of spike protein | part of the spike protein                                      | trimer |                                                                    |
| 6m5i | <a href="#">60</a> | domain        | 1, 2, 3, 0.1                   | nsp7-nsp8c complex                      | potentially interesting as involved in RNA replication         | dimer  |                                                                    |
| 6x4i | <a href="#">26</a> |               | 1, 2, 3                        | endoribonuclease                        |                                                                | 6-mer  | bond distance between intrasidue atoms 00003 and 00018 exceeds 6 Å |
| 6x6p | <a href="#">61</a> | domain        | 1, 2, 3, 0.01, 0.15, 0.25, 0.5 | spike                                   | another spike structure, determined via EM at 3.2 Å resolution | trimer |                                                                    |
| 6xa4 | <a href="#">62</a> | 2nd           | 1, 2, 3, 1.5                   | main protease                           |                                                                | dimer  |                                                                    |

continued on next page

| PDB code | Ref.               | rigidity class. | $E_{\text{cut}}$ 's (kcal/mol) | protein type                                | role | oligomeric state | error                                                              |
|----------|--------------------|-----------------|--------------------------------|---------------------------------------------|------|------------------|--------------------------------------------------------------------|
| 6xa9     | <a href="#">63</a> |                 | 1, 2, 3                        | another protease (not the main one)         |      | hetero-dimer     | bond distance between intrasidue atoms 04000 and 04003 exceeds 6 Å |
| 6xaa     | <a href="#">64</a> |                 | 1, 2, 3                        | same protease as 6xa9 but different complex |      | hetero-dimer     | bond distance between intrasidue atoms 01520 and 01523 exceeds 6 Å |
| 6xb0     | <a href="#">65</a> |                 | 1, 2, 3                        | main protease                               |      | dimer            | bond distance between intrasidue atoms 03354 and 03381 exceeds 6 Å |
| 6xb1     | <a href="#">66</a> | 1st             | 1, 2, 3                        | main protease                               |      | dimer            |                                                                    |
| 6xb2     | <a href="#">67</a> | 2nd             | 1, 2, 3, 0.5                   | main protease                               |      | dimer            |                                                                    |
| 6xbg     | <a href="#">68</a> | 2nd             | 1, 2, 3                        | main protease                               |      | dimer            |                                                                    |
| 6xbh     | <a href="#">69</a> |                 | 1, 2, 3                        | main protease                               |      | dimer            | bond distance between intrasidue atoms 04558 and 04563 exceeds 6 Å |
| 6xbi     | <a href="#">70</a> | 2nd             | 1, 2, 3                        | main protease                               |      | dimer            |                                                                    |
| 6xc2     | <a href="#">71</a> | 2nd, brick      | 1, 2, 3                        | part of the spike protein                   |      | hetero-trimer    |                                                                    |
| 6xc3     | <a href="#">71</a> | brick           | 1, 2, 3, 0.5                   | part of the spike protein                   |      | hetero-5-mer     |                                                                    |
| 6xc4     | <a href="#">71</a> | 3 0             | 1, 2, 3                        | part of the spike protein                   |      | hetero-trimer    |                                                                    |
| 6xc7     | <a href="#">71</a> | 2nd             | 1, 2, 3, 0.5, 1.5              | part of the spike protein                   |      | hetero-5-mer     |                                                                    |
| 6xch     | <a href="#">72</a> | 1 2?            | 1, 2, 3, 0.5, 1.5              | main protease                               |      | dimer            |                                                                    |
| 6xcm     | <a href="#">73</a> | domain          | 1, 2, 3, 0.005, 0.05, 0.2, 0.5 | spike protein                               |      | hetero-7-mer     |                                                                    |

continued on next page

| PDB code | Ref.          | rigidity class. | $E_{cut}$ 's (kcal/mol)         | protein type                            | role                                                                                                                                        | oligomeric state | error                                                              |
|----------|---------------|-----------------|---------------------------------|-----------------------------------------|---------------------------------------------------------------------------------------------------------------------------------------------|------------------|--------------------------------------------------------------------|
| 6xcn     | <sup>73</sup> | domain          | 1, 2, 3, 0.001, 0.02, 0.08, 0.5 | spike protein                           |                                                                                                                                             | hetero-9-mer     | "missing residues, steric clashes"                                 |
| 6xdc     | <sup>74</sup> | domain          | 1, 2, 3, 0.08, 0.25, 0.5        | protein from open reading frame 3       | protein may be part important in the inflammatory response which is critical to understanding why some patients get very ill and others not | dimer            |                                                                    |
| 6xdg     | <sup>75</sup> | domain          | 1, 2, 3, 0.008, 0.04, 0.2       | spike protein                           |                                                                                                                                             | hetero-5-mer     |                                                                    |
| 6xdh     | <sup>47</sup> | 1st             | 1, 2, 3, 0.5, 0.75              | another endoribonuclease                |                                                                                                                                             | trimer           |                                                                    |
| 6xe1     | <sup>76</sup> |                 | 1, 2, 3                         |                                         | part of the spike protein                                                                                                                   | hetero-trimer    | no chain A                                                         |
| 6xfn     | <sup>77</sup> | 2nd             | 1, 2, 3, 0.75                   | main protease                           |                                                                                                                                             | dimer            |                                                                    |
| 6xg3     | <sup>26</sup> |                 | 1, 2, 3                         | This is a protease but not the main one |                                                                                                                                             | monomer          | bond distance between intrasidue atoms 02024 and 02045 exceeds 6 Å |
| 6xhm     | <sup>78</sup> | 1st, 2nd        | 1, 2, 3, 1.5                    | main protease                           |                                                                                                                                             | dimer            |                                                                    |
| 6xhu     | <sup>79</sup> | 1st, 2nd        | 1, 2, 3, 0.5                    | main protease                           |                                                                                                                                             | dimer            |                                                                    |
| 6xip     | <sup>26</sup> | 2nd             | 1, 2, 3, 3.5, 4.5               | nsp7 and 8                              | similar to 6m5i structure but at low resolution                                                                                             | hetero-tetramer  |                                                                    |
| 6xkf     | <sup>80</sup> | 1st, 2nd        | 1, 2, 3, 0.25                   | nsp7 and 9                              | similar to 6m5i structure but at low resolution                                                                                             | homo-dimer       |                                                                    |
| 6xkh     | <sup>81</sup> | 2nd             | 1, 2, 3, 3.5                    | main protease                           |                                                                                                                                             | dimer            |                                                                    |
| 6xkl     | <sup>82</sup> | domain          | 1, 2, 3, 0.05, 0.15, 0.5        | spike protein                           |                                                                                                                                             | trimer           |                                                                    |

continued on next page



| PDB code | Ref.               | rigidity class. | $E_{cut}$ 's (kcal/mol)               | protein type                   | role                                                                                                                                        | oligomeric state | error                                                                |
|----------|--------------------|-----------------|---------------------------------------|--------------------------------|---------------------------------------------------------------------------------------------------------------------------------------------|------------------|----------------------------------------------------------------------|
| 6xkm     | <a href="#">26</a> | 2nd             | 1, 2, 3, 0.25, 1.5                    | nsp10/nsp16 methyl transferase |                                                                                                                                             | hetero-dimer     |                                                                      |
| 6xmk     | <a href="#">83</a> | 2nd             | 1, 2, 3                               | main protease                  | low resolution structure                                                                                                                    | dimer            |                                                                      |
| 6xoa     | <a href="#">84</a> | 1st, 2nd        | 1, 2, 3, 0.2                          | main protease                  |                                                                                                                                             | dimer            |                                                                      |
| 6yz5     | <a href="#">85</a> |                 | 1, 2, 3                               | part of the spike protein      |                                                                                                                                             | hetero-dimer     | no chain A                                                           |
| 6z2m     | <a href="#">86</a> | 2 0             | 1, 2, 3, 0.4, 1.5                     | part of the spike protein      |                                                                                                                                             | hetero-tetramer  |                                                                      |
| 6z43     | <a href="#">87</a> | domain          | 1, 2, 3, 0.05, 0.25                   | spike protein                  |                                                                                                                                             | hetero-6-mer     |                                                                      |
| 6z4u     | <a href="#">88</a> | domain          | 1, 2, 3, 0.001, 0.5                   | Orf9b                          | protein may be involved in immune regulation which is important in understanding the different responses of different patients to infection | homo-dimer       |                                                                      |
| 6z97     | <a href="#">32</a> | domain          | 1, 2, 3, 0.001, 0.01, 0.07, 0.25, 0.5 | spike protein                  |                                                                                                                                             | trimer           |                                                                      |
| 6zco     | <a href="#">89</a> |                 | 1, 2, 3                               | spike protein                  |                                                                                                                                             | dimer            | bond distance between intraresidue atoms 00202 and 00225 exceeds 6 Å |
| 6zct     | <a href="#">90</a> | 1 0             | 1, 2, 3, 0.5                          | nsp10                          | forms part of the methyl transferase complex                                                                                                | monomer          |                                                                      |
| 6zcz     | <a href="#">91</a> |                 | 1, 2, 3                               | part of the spike protein      |                                                                                                                                             | hetero-tetramer  | no chain A                                                           |
| 6zdh     | <a href="#">91</a> | domain          | 1, 2, 3, 0.002, 0.05, 0.2, 0.5        | spike protein                  |                                                                                                                                             | hetero-9-mer     |                                                                      |

continued on next page

| PDB code | Ref.               | rigidity class. | $E_{cut}$ 's (kcal/mol)               | protein type                              | role                                                     | oligomeric state | error                                                              |
|----------|--------------------|-----------------|---------------------------------------|-------------------------------------------|----------------------------------------------------------|------------------|--------------------------------------------------------------------|
| 6zer     | <a href="#">91</a> | 1st, 2nd        | 1, 2, 3, 0.05, 0.25, 0.75             | part of the spike protein                 |                                                          | heterotrimer     |                                                                    |
| 6zfo     | <a href="#">91</a> | 2nd             | 1, 2, 3, 0.1, 0.5                     | part of the spike protein                 |                                                          | heterotrimer     |                                                                    |
| 6zge     | <a href="#">92</a> |                 | 1, 2, 3                               | spike protein                             |                                                          | trimer           | bond distance between intrasidue atoms 12073 and 12092 exceeds 6 Å |
| 6zgg     | <a href="#">93</a> | domain          | 1, 2, 3, 0.002, 0.02, 0.03, 0.1, 0.25 | spike protein                             |                                                          | trimer           |                                                                    |
| 6zgh     | <a href="#">94</a> | domain          | 1, 2, 3, 0.001, 0.03, 0.075, 0.2, 4.2 | spike protein                             |                                                          | trimer           |                                                                    |
| 6zgi     | <a href="#">95</a> | 2nd             | 1, 2, 3                               | spike protein                             |                                                          | trimer           | bond distance between intrasidue atoms 12073 and 12092 exceeds 6 Å |
| 7bq7     | <a href="#">96</a> | domain          | 1, 2, 3, 0.25                         | nsp10/nsp16 methyl transferase            |                                                          | heterodimer      |                                                                    |
| 7bwj     | <a href="#">97</a> |                 | 1, 2, 3                               | part of the spike protein                 |                                                          | heterotrimer     | no chain A                                                         |
| 7byr     | <a href="#">98</a> | domain          | 1, 2, 3, 0.001, 0.03, 0.07, 0.15, 0.5 | spike protein                             |                                                          | hetero-5-mer     |                                                                    |
| 7bzf     | <a href="#">15</a> | 2nd, domain     | 1, 2, 3, 0.02, 0.1, 0.25, 0.5         | RNA polymerase                            | important for replication                                | heterotetramer   |                                                                    |
| 7c2k     | <a href="#">15</a> | 1st, 2nd        | 1, 2, 3, 0.15, 0.25, 0.4              | Complex of proteins needed in replication | chain A is the RNA polymerase which is the important one | heterotetramer   |                                                                    |

continued on next page

| PDB code | Ref.                | rigidity class. | $E_{\text{cut}}$ 's (kcal/mol)  | protein type              | role | oligomeric state | error                                                              |
|----------|---------------------|-----------------|---------------------------------|---------------------------|------|------------------|--------------------------------------------------------------------|
| 7c2l     | <a href="#">99</a>  | domain          | 1, 2, 3, 0.003, 0.08, 0.15, 0.5 | spike protein             |      | hetero-9-mer     |                                                                    |
| 7c8r     | <a href="#">100</a> | 1st, 2hd        | 1, 2, 3                         | main protease             |      | dimer            |                                                                    |
| 7c8t     | <a href="#">101</a> | 1st, 2hd        | 1, 2, 3                         | main protease             |      | dimer            |                                                                    |
| 7c8u     | <a href="#">102</a> | 1st, 2hd        | 1, 2, 3, 0.5                    | main protease             |      | dimer            |                                                                    |
| 7c8v     | <a href="#">103</a> | brick           | 1, 2, 3                         | part of the spike protein |      | hetero-dimer     |                                                                    |
| 7c8w     | <a href="#">104</a> |                 | 1, 2, 3                         | art of the spike protein  |      | hetero-dimer     | bond distance between intrasidue atoms 00965 and 00966 exceeds 6 Å |
| 7can     | <a href="#">105</a> |                 | 1, 2, 3                         | part of the spike protein |      | hetero-dimer     | bond distance between intrasidue atoms 00966 and 00989 exceeds 6 Å |

**Table S1.** List of all SARS-Cov-2-related structures investigated in this study. The relevant references have been provided if they had been listed on the PDB download pages for each PDB code at the time of download access. The abbreviation "icw." stands for "in complex with". Two large scale collaborations have been labelled by acronyms PANDDA<sup>11</sup> and CSGID<sup>26</sup>. The rigidity association into solid "brick", 1st and 2nd order as well as rigidity domains are given on column 3. Values for  $E_{\text{cut}}$  are given explicitly whereas all results have been computed for all 6 modes  $m_7$  to  $m_{12}$ . Protein description, role and oligomeric state are as written of from the information in each PDB entry or in the referenced publication. The last column indicates the computational error encountered when no motion result has been computed.

## References

1. RA Römer, NS Römer, AK Wallis, Flex-Covid19 data repository, <https://warwick.ac.uk/flex-covid19-data> (2020).
2. RA Römer, NS Römer, AK Wallis, 6vxx-monomer, [https://livewarwickac.sharepoint.com/:v:/s/Flex-Covid19/EQern4arlFtFmBJgcdJGZfoBRXIS4foHGWeL\\_CY-R8qDVA?e=JdhKHS](https://livewarwickac.sharepoint.com/:v:/s/Flex-Covid19/EQern4arlFtFmBJgcdJGZfoBRXIS4foHGWeL_CY-R8qDVA?e=JdhKHS) (2020).
3. RA Römer, NS Römer, AK Wallis, 6lu7-dimer, <https://livewarwickac.sharepoint.com/:v:/s/Flex-Covid19/EW5Tj2CCMfJMop2RCxJNSFYBBbiFaeNLC9MC1eNfxX-lug?e=w5883E> (2020).
4. RA Römer, NS Römer, AK Wallis, 6vxx-trimer-side, [https://livewarwickac.sharepoint.com/:v:/s/Flex-Covid19/EVRO0oUOFJGlnys98iQ3W0BeQPnxIH92GkwP9w\\_GuKzzg?e=XTLwT7](https://livewarwickac.sharepoint.com/:v:/s/Flex-Covid19/EVRO0oUOFJGlnys98iQ3W0BeQPnxIH92GkwP9w_GuKzzg?e=XTLwT7) (2020).
5. RA Römer, NS Römer, AK Wallis, 6vxx-trimer-top, [https://livewarwickac.sharepoint.com/:v:/s/Flex-Covid19/EXfYlRnIaJNHpR-VJjfbysB8yqrHSRHoTfSTeEjox4\\_XQ?e=84I094](https://livewarwickac.sharepoint.com/:v:/s/Flex-Covid19/EXfYlRnIaJNHpR-VJjfbysB8yqrHSRHoTfSTeEjox4_XQ?e=84I094) (2020).
6. RA Römer, NS Römer, AK Wallis, 6vyb-trimer-side, [https://livewarwickac.sharepoint.com/:v:/s/Flex-Covid19/EUETBeGAatZOp4SGFew7P6ABPY1LSPsXNTm\\_ck2JjiGnaw?e=m4SRzh](https://livewarwickac.sharepoint.com/:v:/s/Flex-Covid19/EUETBeGAatZOp4SGFew7P6ABPY1LSPsXNTm_ck2JjiGnaw?e=m4SRzh) (2020).
7. RA Römer, NS Römer, AK Wallis, 6vyb-trimer-top, <https://livewarwickac.sharepoint.com/:v:/s/Flex-Covid19/EShhXMwZf8NMI2FdmQBARFsBxV9DbFR7K2bJpEMfys6Njg?e=sX5sbG> (2020).
8. RA Römer, NS Römer, AK Wallis, rigidity dilution decomposition plot for 6lu7, [https://files.warwick.ac.uk/rroemer/files/6lu7-dimer\\_hydro.ps](https://files.warwick.ac.uk/rroemer/files/6lu7-dimer_hydro.ps) (2020).
9. RA Römer, NS Römer, AK Wallis, rigidity dilution decomposition plot for 6vxx, [https://files.warwick.ac.uk/rroemer/files/6vxx-trimer\\_hydro.ps](https://files.warwick.ac.uk/rroemer/files/6vxx-trimer_hydro.ps) (2020).
10. RA Römer, NS Römer, AK Wallis, rigidity dilution decomposition plot for 6vyb, [https://files.warwick.ac.uk/rroemer/files/6vyb-trimer\\_hydro.ps](https://files.warwick.ac.uk/rroemer/files/6vyb-trimer_hydro.ps) (2020).
11. PanDDA analysis group. PanDDA analysis group deposition (2020).
12. Jin, Z. *et al.* Structure of M pro from COVID-19 virus and discovery of its inhibitors. *Nature* DOI: [10.1038/s41586-020-2223-y](https://doi.org/10.1038/s41586-020-2223-y) (2020).
13. Zhu, Y. & Sun, F. RCSB PDB - 6LVN: Structure of the 2019-nCoV HR2 Domain.
14. Xia, S. *et al.* Inhibition of SARS-CoV-2 (previously 2019-nCoV) infection by a highly potent pan-coronavirus fusion inhibitor targeting its spike protein that harbors a high capacity to mediate membrane fusion. *Cell Res.* **30**, 343–355, DOI: [10.1038/s41422-020-0305-x](https://doi.org/10.1038/s41422-020-0305-x) (2020).
15. Wang, Q. Q. *et al.* Structural and Functional Basis of SARS-CoV-2 Entry by Using Human ACE2. *Cell* **181**, 894–904, DOI: [10.1016/j.cell.2020.03.045](https://doi.org/10.1016/j.cell.2020.03.045) (2020).
16. Zhang, L. *et al.* Crystal structure of SARS-CoV-2 main protease provides a basis for design of improved a-ketoamide inhibitors. Tech. Rep. (2020). DOI: [10.1126/science.abb3405](https://doi.org/10.1126/science.abb3405).
17. Lan, J. *et al.* Structure of the SARS-CoV-2 spike receptor-binding domain bound to the ACE2 receptor. *Nature* **581**, 215–220, DOI: [10.1038/s41586-020-2180-5](https://doi.org/10.1038/s41586-020-2180-5) (2020).
18. Yan, R. *et al.* Structural basis for the recognition of SARS-CoV-2 by full-length human ACE2. *Science* **367**, 1444–1448, DOI: [10.1126/science.abb2762](https://doi.org/10.1126/science.abb2762) (2020).
19. Su, H., Zhao, W., Li, M., Xie, H. & Xu, Y. RCSB PDB - 6M2N: SARS-CoV-2 3CL protease (3CL pro) in complex with a novel inhibitor.
20. Su, H., Zhao, W., Li, M., Xie, H. & Xu, Y. RCSB PDB - 6M2Q: SARS-CoV-2 3CL protease (3CL pro) apo structure (space group C21).
21. Chen, Y. *et al.* Biochemical and Structural Insights into the Mechanisms of SARS Coronavirus RNA Ribose 2'-O-Methylation by nsp16/nsp10 Protein Complex. *PLoS Pathog.* **7**, e1002294, DOI: [10.1371/journal.ppat.1002294](https://doi.org/10.1371/journal.ppat.1002294) (2011).
22. Gao, Y. *et al.* Structure of the RNA-dependent RNA polymerase from COVID-19 virus. *Science* **368**, 779–782, DOI: [10.1126/science.abb7498](https://doi.org/10.1126/science.abb7498) (2020).
23. Wrapp, D. *et al.* Cryo-EM structure of the 2019-nCoV spike in the prefusion conformation. *Science* **367**, 1260–1263, DOI: [10.1126/science.abb2507](https://doi.org/10.1126/science.abb2507) (2020).
24. Shang, J. *et al.* Structural basis of receptor recognition by SARS-CoV-2. *Nature* **581**, 221–224, DOI: [10.1038/s41586-020-2179-y](https://doi.org/10.1038/s41586-020-2179-y) (2020).

25. Kim, Y. *et al.* Crystal structure of Nsp15 endoribonuclease NendoU from SARS-CoV-2. *Protein Sci.* pro.3873, DOI: [10.1002/pro.3873](https://doi.org/10.1002/pro.3873) (2020).
26. CSGID. CSGID analysis group (2020).
27. Walls, A. C. *et al.* Structure, Function, and Antigenicity of the SARS-CoV-2 Spike Glycoprotein. *Cell* **181**, 281–292, DOI: [10.1016/j.cell.2020.02.058](https://doi.org/10.1016/j.cell.2020.02.058) (2020).
28. Yuan, M. *et al.* A highly conserved cryptic epitope in the receptor binding domains of SARS-CoV-2 and SARS-CoV, DOI: [10.1126/science.abb7269](https://doi.org/10.1126/science.abb7269) (2020).
29. Littler, D., Gully, B., Riboldi-Tunncliffe, A. & Rossjohn, J. RCSB PDB - 6W9Q: Peptide-bound SARS-CoV-2 Nsp9 RNA-replicase.
30. Owen, C. *et al.* RCSB PDB - 6Y84: SARS-CoV-2 main protease with unliganded active site (2019-nCoV, coronavirus disease 2019, COVID-19).
31. Veverka, V. & Boura, E. RCSB PDB - 6YI3: The N-terminal RNA-binding domain of the SARS-CoV-2 nucleocapsid phosphoprotein.
32. Huo, J. *et al.* Neutralization of SARS-CoV-2 by Destruction of the Prefusion Spike. *Cell Host Microbe* DOI: [10.1016/j.chom.2020.06.010](https://doi.org/10.1016/j.chom.2020.06.010) (2020).
33. Vuksanovic, N. & Silvaggi, N. RCSB PDB - 6WEY: High-resolution structure of the SARS-CoV-2 NSP3 Macro X domain.
34. Gupta, Y., Viswanathan, T., Arya, S. & Qi, S. RCSB PDB - 6WKS: Structure of SARS-CoV-2 nsp16/nsp10 ternary complex.
35. Kneller, D., Kovalevsky, A. & Coates, L. RCSB PDB - 6WQF: Structural Plasticity of the SARS-CoV-2 3CL Mpro Active Site Cavity Revealed by Room Temperature X-ray Crystallography.
36. Konkolova, E., Klima, M. & Boura, E. RCSB PDB - 6YHU: Crystal structure of the nsp7-nsp8 complex of SARS-CoV-2.
37. Guenther, S. *et al.* RCSB PDB - 6YNQ: Structure of SARS-CoV-2 Main Protease bound to 2-Methyl-1-tetralone.
38. Huo, J. *et al.* RCSB PDB - 6YOR: Structure of the SARS-CoV-2 spike S1 protein in complex with CR3022 Fab.
39. Guenther, S. *et al.* RCSB PDB - 6YT8: Structure of SARS-CoV-2 Main Protease bound to pyrithione zinc.
40. Shin, D. & Dikic, I. RCSB PDB - 6YVA: PLpro-C111S with mISG15.
41. Ni, X. *et al.* Structural Genomics Consortium.
42. Hillen, H. *et al.* RCSB PDB - 6YYT: Structure of replicating SARS-CoV-2 polymerase.
43. Krafcikova, P., Silhan, J., Nencka, R. & Boura, E. RCSB PDB - 6YZ1: The crystal structure of SARS-CoV-2 nsp10-nsp16 methyltransferase complex with Sinefungin.
44. Fu, L. RCSB PDB - 7BRO: Crystal structure of the 2019-nCoV main protease.
45. Yin, W. *et al.* RCSB PDB - 7BV1: Cryo-EM structure of the apo nsp12-nsp7-nsp8 complex.
46. Wu, Y., Qi, J. & Gao, F. RCSB PDB - 7BZ5: Structure of COVID-19 virus spike receptor-binding domain complexed with a neutralizing antibody.
47. Pinto, D. *et al.* Seattle Structural Genomics Center for Infectious Disease.
48. Khan, M., Arutyunova, E., Young, H. & Lemieux, M. RCSB PDB - 6WTJ: Feline coronavirus drug inhibits the main protease of SARS-CoV-2 and blocks virus replication.
49. Sacco, M., Ma, C., Chen, Y. & Wang, J. RCSB PDB - 6WTT: Crystals Structure of the SARS-CoV-2 (COVID-19) main protease with inhibitor GC-376.
50. Lv, Z. & Olsen, S. RCSB PDB - 6WUU: Crystal structure of the SARS CoV-2 Papain-like protease in complex with peptide inhibitor VIR250.
51. Littler, D., Gully, B., Riboldi-Tunncliffe, A. & Rossjohn, J. RCSB PDB - 6WXD: SARS-CoV-2 Nsp9 RNA-replicase.
52. Ye, Q. & Corbett, K. RCSB PDB - 6WZO: Structure of SARS-CoV-2 Nucleocapsid dimerization domain, P1 form.
53. Henderson, R. & Acharya, P. RCSB PDB - 6X29: SARS-CoV-2 rS2d Down State Spike Protein Trimer.
54. Zinzula, L., Basquin, J., Nagy, I. & Bracher, A. RCSB PDB - 6YUN: 1.45 Angstrom Resolution Crystal Structure of C-terminal Dimerization Domain of Nucleocapsid Phosphoprotein from SARS-CoV-2.

55. Peng, Q., Peng, R. & Shi, Y. RCSB PDB - 7BW4: Structure of the RNA-dependent RNA polymerase from SARS-CoV-2.
56. Shi, R., Qi, J., Wang, Q., Gao, F. & Yan, J. RCSB PDB - 7C01: Molecular basis for a potent human neutralizing antibody targeting SARS-CoV-2 RBD.
57. Zhou, R., Zeng, R. & Lei, J. RCSB PDB - 7C22: Crystal structure of the C-terminal domain of SARS-CoV-2 nucleocapsid protein.
58. Lin, S. *et al.* RCSB PDB - 7C2I: Crystal structure of nsp16-nsp10 heterodimer from SARS-CoV-2 in complex with SAM (with additional SAM during crystallization).
59. Sun, H., Song, H. & Wang, Q. RCSB PDB - 6M1V: Crystal structure of post fusion core of 2019-nCoV S2 subunit (2020).
60. Yan, L., Ge, J., Lou, Z. & Rao, Z. RCSB PDB - 6M5I: Crystal structure of 2019-nCoV nsp7-nsp8c complex.
61. RCSB PDB - 6X6P: Characterization of the SARS-CoV-2 S Protein: Biophysical, Biochemical, Structural, and Antigenic Analysis.
62. Sacco, M., Chen, Y. & Ma, C. RCSB PDB - 6XA4: Crystal structure of the SARS-CoV-2 (COVID-19) main protease in complex with UAW241.
63. Klemm, T. RCSB PDB - 6XA9: SARS CoV-2 PLpro in complex with ISG15 C-terminal domain propargylamide.
64. Klemm, T. RCSB PDB - 6XAA: SARS CoV-2 PLpro in complex with ubiquitin propargylamide.
65. Kneller, D. *et al.* RCSB PDB - 6XB0: Room temperature X-ray crystallography reveals catalytic cysteine in the SARS-CoV-2 3CL Mpro is highly reactive: Insights for enzyme mechanism and drug design.
66. Kneller, D. *et al.* RCSB PDB - 6XB1: Room temperature X-ray crystallography reveals catalytic cysteine in the SARS-CoV-2 3CL Mpro is highly reactive: Insights for enzyme mechanism and drug design.
67. Kneller, D. *et al.* RCSB PDB - 6XB2: Room temperature X-ray crystallography reveals catalytic cysteine in the SARS-CoV-2 3CL Mpro is highly reactive: Insights for enzyme mechanism and drug design.
68. Ma, C., Sacco, M., Chen, Y. & Wang, J. RCSB PDB - 6XBG: Crystal structure of the SARS-CoV-2 (COVID-19) main protease in complex with inhibitor UAW246.
69. Ma, C., Sacco, M., Chen, Y. & Wang, J. RCSB PDB - 6XBH: Crystal structure of the SARS-CoV-2 (COVID-19) main protease in complex with inhibitor UAW247.
70. Ma, C., Sacco, M., Chen, Y. & Wang, J. RCSB PDB - 6XBI: Crystal structure of the SARS-CoV-2 (COVID-19) main protease in complex with inhibitor UAW248.
71. Yuan, M. *et al.* RCSB PDB - 6XC2: Crystal structure of SARS-CoV-2 receptor binding domain in complex with neutralizing antibody CC12.1.
72. Kneller, D., Coates, L. & Kovalevsky, A. RCSB PDB - 6XCH: Structure of the complex between the SARS-CoV-2 Main Protease and Leupeptin.
73. Barnes, C. O. *et al.* Structures of Human Antibodies Bound to SARS-CoV-2 Spike Reveal Common Epitopes and Recurrent Features of Antibodies. *Cell* DOI: [10.1016/j.cell.2020.06.025](https://doi.org/10.1016/j.cell.2020.06.025) (2020).
74. Kern, D. M. *et al.* Cryo-EM structure of the SARS-CoV-2 3a ion channel in lipid nanodiscs. *bioRxiv : preprint server for biology* DOI: [10.1101/2020.06.17.156554](https://doi.org/10.1101/2020.06.17.156554) (2020).
75. Hansen, J. *et al.* Studies in humanized mice and convalescent humans yield a SARS-CoV-2 antibody cocktail. *Science* eabd0827, DOI: [10.1126/science.abd0827](https://doi.org/10.1126/science.abd0827) (2020).
76. Hurlburt, N. K. *et al.* Structural basis for potent neutralization of SARS-CoV-2 and role of antibody affinity maturation. *bioRxiv : preprint server for biology* DOI: [10.1101/2020.06.12.148692](https://doi.org/10.1101/2020.06.12.148692) (2020).
77. Sacco, M., Chen, Y. & Ma, C. RCSB PDB - 6XFN: Crystal structure of the SARS-CoV-2 (COVID-19) main protease in complex with UAW243.
78. Hoffman, R. *et al.* RCSB PDB - 6XHM: Covalent complex of SARS-CoV-2 main protease with N-[(2S)-1-((2S,3S)-3,4-dihydroxy-1-[(3S)-2-oxopyrrolidin-3-yl]butan-2-yl)amino)-4-methyl-1-oxopentan-2-yl]-4-methoxy-1H-indole-2-carboxamide.
79. Kneller, D. *et al.* RCSB PDB - 6XHU: Room temperature X-ray crystallography reveals oxidation and reactivity of cysteine residues in SARS-CoV-2 3CL Mpro: Insights for enzyme mechanism and drug design.

80. Tan, K. *et al.* RCSB PDB - 6XKF: The crystal structure of 3CL MainPro of SARS-CoV-2 with oxidized Cys145 (Sulfenic acid cysteine).
81. Tan, K. *et al.* RCSB PDB - 6XKH: THE 1.28Å CRYSTAL STRUCTURE OF 3CL MAINPRO OF SARS-COV-2 WITH OXIDIZED C145 (sulfenic acid cysteine).
82. Wrapp, D., Hsieh, C.-L., Goldsmith, J. & McLellan, J. RCSB PDB - 6XKL: SARS-CoV-2 HexaPro S One RBD up.
83. Rathnayake, A. *et al.* RCSB PDB - 6XMK: 1.70 Å resolution structure of SARS-CoV-2 3CL protease in complex with inhibitor 7j.
84. Tan, K., Maltseva, N., Welk, L., Jedrzejczak, R. & Joachimiak, A. RCSB PDB - 6XOA: The crystal structure of 3CL MainPro of SARS-CoV-2 with C145S mutation.
85. Naismith, J. RCSB PDB - 6YZ5: H11-D4 complex with SARS-CoV-2 RBD.
86. Naismith, J. RCSB PDB - 6Z2M: H11-D4, SARS-CoV-2 RBD, CR3022 ternary complex.
87. Huo, J. *et al.* RCSB PDB - 6Z43: Cryo-EM Structure of SARS-CoV-2 Spike : H11-D4 Nanobody Complex.
88. Weeks, S., De Graef, S. & Munawar, A. RCSB PDB - 6Z4U: X-ray Crystallographic Structure of Orf9b from SARS-CoV-2.
89. Zinzula, L., Basquin, J., Bracher, A. & Baumeister, W. RCSB PDB - 6ZCO: Crystal Structure of C-terminal Dimerization Domain of Nucleocapsid Phosphoprotein from SARS-CoV-2, crystal form II.
90. Rogstam, A. *et al.* RCSB PDB - 6ZCT: Nonstructural protein 10 (nsp10) from SARS CoV-2.
91. Zhou, D. *et al.* Structural basis for the neutralization of SARS-CoV-2 by an antibody from a convalescent patient. *Nat. Struct. Mol. Biol.* DOI: [10.1038/s41594-020-0480-y](https://doi.org/10.1038/s41594-020-0480-y) (2020).
92. Wrobel, A. *et al.* RCSB PDB - 6ZGE: Uncleavable Spike Protein of SARS-CoV-2 in Closed Conformation.
93. Wrobel, A. *et al.* RCSB PDB - 6ZGG: Furin Cleaved Spike Protein of SARS-CoV-2 with One RBD Erect.
94. Wrobel, A. *et al.* RCSB PDB - 6ZGH: Furin Cleaved Spike Protein of SARS-CoV-2 in Intermediate Conformation.
95. Wrobel, A. *et al.* RCSB PDB - 6ZGI: Furin Cleaved Spike Protein of SARS-CoV-2 in Closed Conformation.
96. Yan, L., Huang, Y., Lou, Z. & Rao, Z. RCSB PDB - 7BQ7: Crystal structure of 2019-nCoV nsp16-nsp10 complex.
97. Ju, B. *et al.* Human neutralizing antibodies elicited by SARS-CoV-2 infection. *Nature* **584**, 115–119, DOI: [10.1038/s41586-020-2380-z](https://doi.org/10.1038/s41586-020-2380-z) (2020).
98. Cao, Y. *et al.* Potent Neutralizing Antibodies against SARS-CoV-2 Identified by High-Throughput Single-Cell Sequencing of Convalescent Patients B Cells. *Cell* **182**, 73–84, DOI: [10.1016/j.cell.2020.05.025](https://doi.org/10.1016/j.cell.2020.05.025) (2020).
99. Chi, X. *et al.* A neutralizing human antibody binds to the N-terminal domain of the Spike protein of SARS-CoV-2. *Science* eabc6952, DOI: [10.1126/science.abc6952](https://doi.org/10.1126/science.abc6952) (2020).
100. Kuo, C. *et al.* RCSB PDB - 7C8R: Complex Structure of SARS-CoV-2 3CL Protease with TG-0203770.
101. Kuo, C. *et al.* RCSB PDB - 7C8T: Complex Structure of SARS-CoV-2 3CL Protease with TG-0205221.
102. Zhang, S., Luan, X. & Wang, F. RCSB PDB - 7C8U: The crystal structure of COVID-19 main protease in complex with GC376.
103. Li, T. *et al.* RCSB PDB - 7C8V: Structure of sybody SR4 in complex with the SARS-CoV-2 S Receptor Binding domain (RBD).
104. Li, T. *et al.* RCSB PDB - 7C8W: Structure of sybody MR17 in complex with the SARS-CoV-2 S receptor-binding domain (RBD).
105. Li, T. *et al.* RCSB PDB - 7CAN: Structure of sybody MR17-K99Y in complex with the SARS-CoV-2 S Receptor-binding domain (RBD).
